# Supplementary material
Source: PubMed Central journal article supplement (PMC9487491)
Supplement: Author_correction.pdf [file Author_correction.pdf]

Author correction

“Changing demographics of pulmonary arterial hypertension in congenital heart disease”. B.J.M. Mulder. *Eur Respir Rev* 2010; 19: 308–313.

Unfortunately, the abbreviation CTD was mistakenly used in a sentence in this article. The abbreviation should have appeared as CHD to refer to congenital heart disease. The corrected sentence is as follows:

“Down’s syndrome represents another patient population at risk for PAH-CHD.”
